# Supplementary material for: Computational Structure Prediction Provides a Plausible Mechanism for Electron Transfer by the Outer Membrane Protein Cyc2 from Acidithiobacillus ferrooxidans
Source: bioRxiv or medRxiv preprint supplement (doi:10.1101/2021.03.22.436458), 2021-03-22
Supplement: Supplementary file [file media-1.pdf]

Supplementary Information for:

**Computational Structure Prediction of the Outer Membrane  
Protein Cyc2 from *Acidithiobacillus ferrooxidans***

Virginia Jiang<sup>1</sup>, Sagar Khare<sup>2</sup> and Scott Banta<sup>1,\*</sup>

<sup>1</sup>Department of Chemical Engineering, Columbia University in the City of New York, New York, NY 10027, USA

<sup>2</sup>Department of Chemistry and Chemical Biology, Rutgers, The State University of New Jersey, Piscataway, NJ 08854, USA

\**Corresponding author.* Tel: +1-212-854-7531. Fax: +1-212-854-3054. E-mail address: sbanta@columbia.edu,

MVSSSVGFKKKRLIVALAAVGGMALSSGAWALPSFARQTGWSCAACHTSYPQLTPMGRMFKLLGFTTT  
NLQRQQKLQAKFGNSVGLLISRVSQFSIFLQASATNVGGGQAVFGPGNSNAGASPNNNVQFPQQVSLFY  
 AGEITPHIGSFLHLTYSGGGSGAGAGGFSFDDSSIVWTHPWKLGTNLLVTGVDVNTPTAMDWNTTP  
 DWQAPFFSSDYSSWGHVPQPFIESSAGAGYPLAGVGVYADIFGPNRANWLYADADVYTNQGQTQVN  
 PVGGFTAAGPQGRLSGGAPYVRLAYQHDWGDWNWEVGTFGMWSSVYDNTINNTLNKAGGPIDTFDDY  
 DLDTQLQWLDTNDNNNVTIRAAWVNEQQQFGAGNVISSNSSGNLFFNINATYWYHDHYGIQGGYRNV  
 WGSANPGLYGTTYTNSGSPDTSNEWIEASYLPWWNTRFSLRYVVYNKFNGVGSASSNNLGYGASAYNT  
 LELLAWISY

**Fig. S1: Primary sequence of Cyc2** (UNIPROT: B7JAQ7\_ACIF2) (85). Underlined residues have been identified as a signal peptide (5).

|                                                                   |      |
|-------------------------------------------------------------------|------|
| atggtgcat cgtccgttg ttttaaaaag aaaaggtga tcgtagcatt agcagcagtt    | 60   |
| ggtggaatgg cgtgtcttc cggtcctgg gcactgccat ccttgcgcg tcagaccggt    | 120  |
| tggtcgtgcg ctgcctgca cacatcctac ccgcagttga cgcccatggg cagaatgttc  | 180  |
| aaattgctcg ggttcacgac cacaacctg caacggcaac agaaactcca agccaagttc  | 240  |
| gggaacagcg tcggtctgct catatcccg gtatcacaat tttctatit tctgcaggct   | 300  |
| tcggcgacca atgttggtg cggtcaggcg gtgtttggtc ctgggaactc taatgcgggt  | 360  |
| gcttctccc acaataatgt tcagttccc caacaggtga gcttgttcta tgcggtgaa    | 420  |
| atcactccgc atattgggtc gtttctgcat ttgacctact ctggcggcgg cagtggtgcc | 480  |
| ggtgccggag gatttagttt tgatgactcc agcattgtct ggacctatcc atggaagttg | 540  |
| ggcaccaata atcttttgg cacgggcgta gacgtcaaca atacgccgac tgctatggac  | 600  |
| tttggaata ccacaccgga ttggcaggca ccattttta gtcagacta ttcgtcttgg    | 660  |
| ggccacgtac ctacgccatt cattgaaagt tcagcaggtg ctggttacc attagcgggt  | 720  |
| gttggtgtct acggagccga tatctcggg ccaaacaggg caaactggct ctacgcagac  | 780  |
| gccgatgitt ataccaacgg tcaaggaacc caggtcaacc cggttggcgg ctttactgca | 840  |
| gctggcccc agggcagact ttcagggggc gcccctatg ttcgtcttc ctatcagcac    | 900  |
| gattggggtg actggaactg ggaggtcgg acctttggca tgtgtccag cgtgtacgat   | 960  |
| aacaccataa ataactct caataaagca ggcgcccca ttgatacctt cgtatgattat   | 1020 |
| gatttagata ctacgctcca atggctgac accaacgaca acaataactg gacgatccgt  | 1080 |
| gctgcatggg taaacgagca gcagcaattt ggagcgggga atgtcatatc ttcgaactcc | 1140 |
| tccgtaact tgaattctt caatattaat gccacctatt ggtatcacga ccactacggt   | 1200 |
| atccagggcg gataccgaa tgtgtgggga tccgccaacc ccggtctcta cgttaccaca  | 1260 |
| tacaccaata gtggttctc ggacaccagc aatgaatga tagaggcttc ctatctgccg   | 1320 |
| tggtggaata cccgcttct cttgcgatat gtcgtataca acaagttcaa tggcgttgg   | 1380 |
| tcggcgtcgt ccaacaacct tggatatggg gcgtctcgt ataacacct tgaactgctg   | 1440 |
| gcctggatat catactag                                               |      |

**Fig. S2: DNA sequence of Cyc2** (ENA: ACK79618) (85)

hbond\_sr\_bb 1.17  
 hbond\_lr\_bb 1.17  
 rama 0.15  
 omega 0.2  
 rg 0.1  
 vdw 3.0  
 Menv 2.019  
 Mpair 1.0  
 Mcbeta 2.5  
 cenpack\_smooth 1.0  
 cart\_bonded 0.05  
 atom\_pair\_constraint 0.5  
 Mlipo 1.0  
 rsigma 1.0  
 sheet 1.0  
 ss\_pair 1.0  
 hs\_pair 1.0

**Fig. S3: Modified RosettaCM stage 2 centroid level weights.** Modified from membrane RosettaCM protocol (13).

|             | <i>Existing</i> | <i>New</i> |
|-------------|-----------------|------------|
| <i>1bxw</i> | 18.91 Å         | 4.45 Å     |
| <i>1qd6</i> | 16.41 Å         | 6.51 Å     |
| <i>1kmo</i> | 13.25 Å         | 8.37 Å     |

**Fig. S4: RMSD for lowest-scoring trajectories for RosettaCM modeling test set.** To benchmark these altered scoring functions, we used the modified TMBB CM protocol to create comparative models for three test TMBB proteins that have experimental structures available in the Protein Data Bank. Test case proteins were chosen based on availability of membrane information in the crystal structure and similar low percentages of sequence homology (less than 20% sequence identity). Homologous proteins, on which the sequence was threaded had below 30% sequence identity. This replicated conditions similar to the available homologs for Cyc2. The C-alpha RMSD values for the lowest scoring models after the low-resolution step using existing membrane scorefunctions (Existing) were compared to our new beta-barrel membrane score functions (New). The new model yield small RMSD values for each protein.

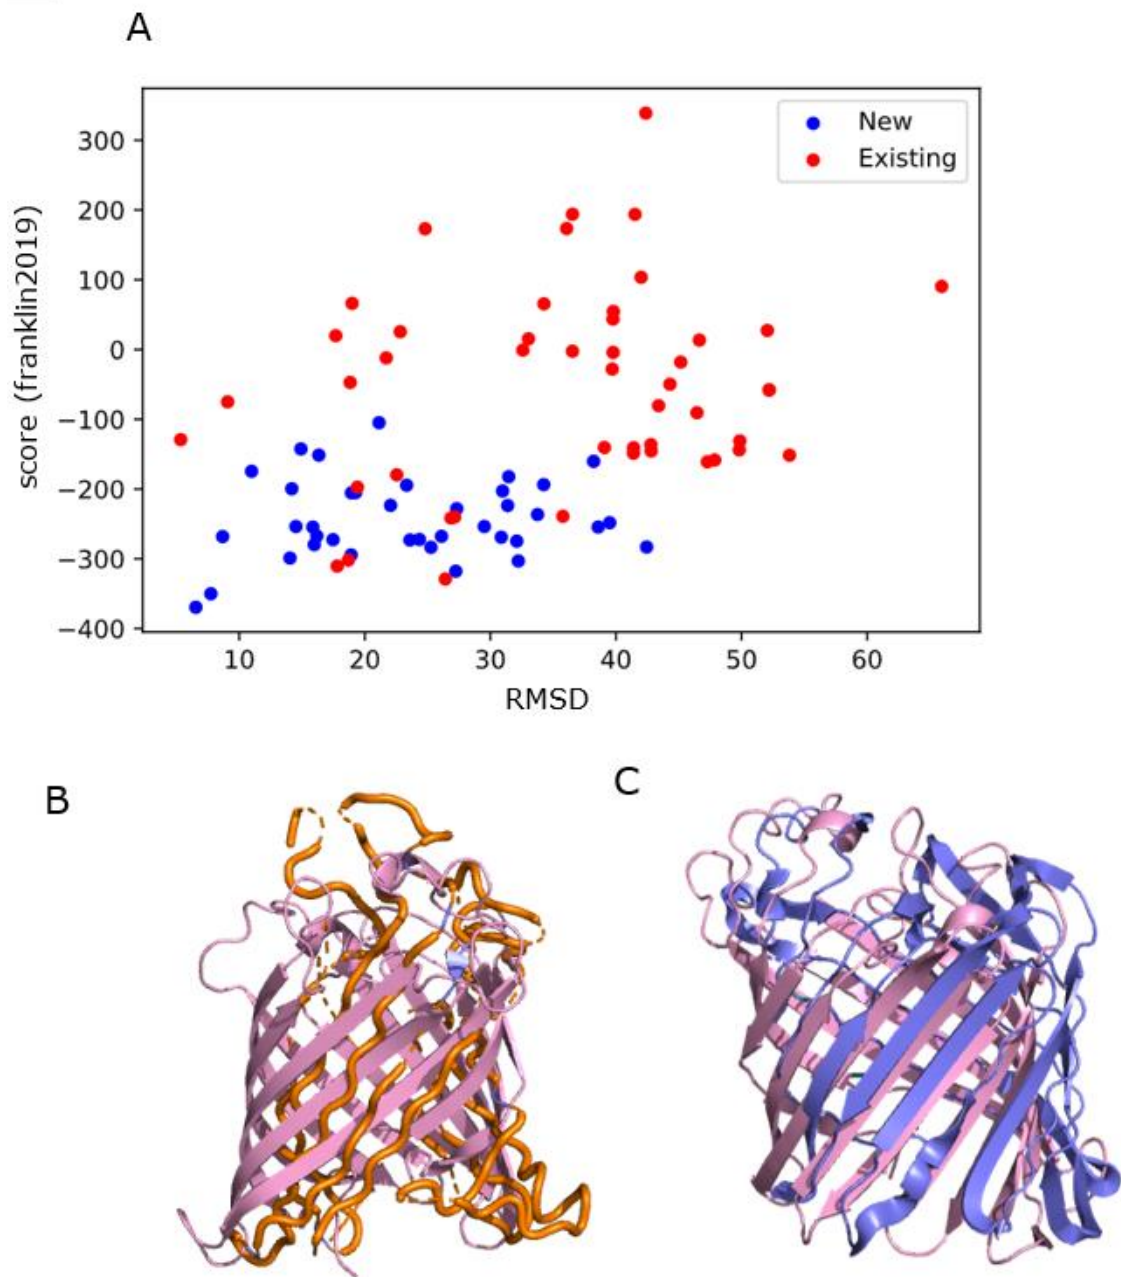

**Fig. S5: Sample benchmark testing on experimentally determined TMBB structure.**

Comparisons of RMSD between the new score function and the existing score function for the test set were done in Excel using a one-way ANOVA. Score vs. RMSD plots showed a narrower energy funnel for our TMBB score functions A: Score vs. RMSD plot for TMBB 1qd6 using existing centroid-level score function and modified centroid-level score function for the intermediate folding steps in RosettaCM. Final models were scored with the franklin2019 score function. B: Comparison between experimental (pink) and lowest-scoring CM 1qd6 trajectory with original scoring protocol (orange), with RMSD = 16.41. C: Comparison between experimental (pink) and CM 1qd6 with new scoring protocol (purple), with RMSD = 6.51.

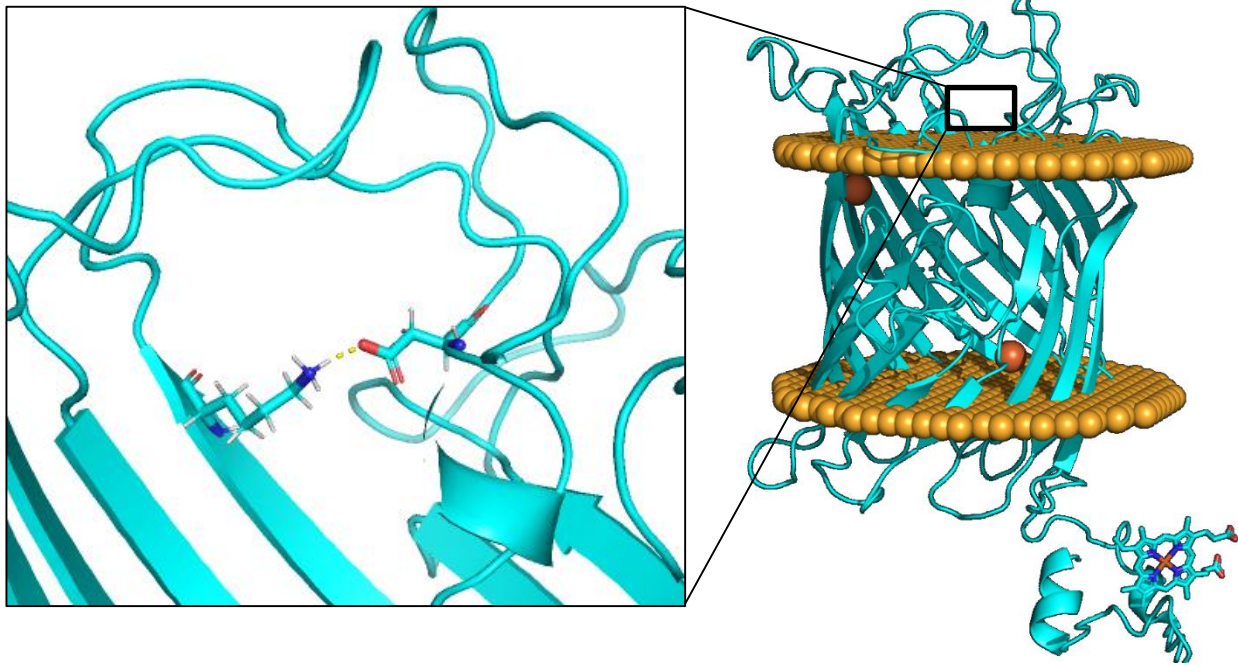

**Fig. S6. Effect of pH on Modeling of Cyc2.** Modeling at pH 2 did not modify the backbone structure, however the low pH environment eliminated the formation of a salt bridge predicted in the structure at pH 7. At pH 7 a salt bridge could form between NZ of LYS424 and OD2 of ASP185.

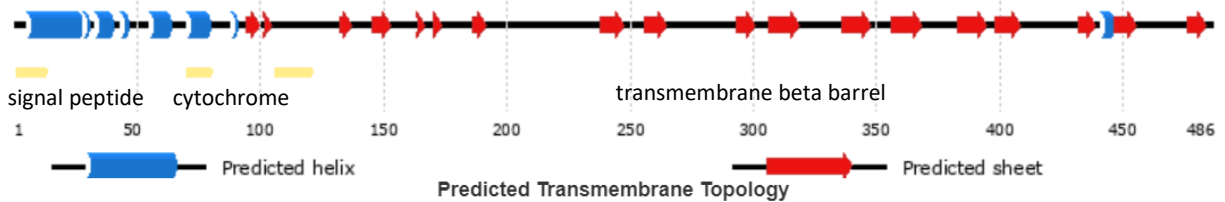

**Fig. S7: Domains of Cyc2 sequence.** Computed by PSIPRED secondary structure prediction. Cyc2 has an anomalously high molar extinction coefficient ( $144520.00 \text{ M}^{-1}\text{cm}^{-1}$ ), indicating many aromatic residues. These residues can accept and donate electrons, indicating that Cyc2 is a likely electron transport protein.

| <b>NCBI accession number</b> | <b>Species</b>                        |
|------------------------------|---------------------------------------|
| ACK79618.1 (TARGET)          | <i>Acidithiobacillus ferrooxidans</i> |
| WP_114282823.1               | <i>Acidiferrobacter thiooxydans</i>   |
| WP_070079636.1               | <i>Acidihalobacter prosperous</i>     |
| OYV75648.1                   | <i>Chromatiales bacterium</i>         |
| HAH22798.1                   | <i>Prolixibacteraceae bacterium</i>   |
| PYO94379.1                   | <i>Gemmatimonadetes bacterium</i>     |
| TSA29379.1                   | <i>Ignavibacteriales bacterium</i>    |
| NJD23605.1                   | <i>Melioribacter sp.</i>              |
| ODU99277.1                   | <i>Rubrivivax sp.</i>                 |
| TLZ45134.1                   | <i>Gammaproteobacteria bacterium</i>  |
| AOY94926.1                   | <i>Cupriavidus sp.</i>                |

```

cyc2 -----LPSFARQTGWSCAACHTSYPO 21
WP_114282823.1 MFHREKNSMAFKIPRLEPRKVLALTSIIIGGLAMSANAWALPSFARQTGWSCATCHTSFPQ 60
WP_070079636.1 -----MSISIIHRH---LRL-PAGAISLLLPPFAPAHAVPSFARQLGVSCAACHTAYPQ 48
OYV75648.1 -----MALGLASTAVYAVPSFARQTGMPCSAACHTVFPE 33
HAH22798.1 -----GI---NILKLFILMIIAQAGVSKATPSFARQTGMSC TACHYSFPE 43
PYO94379.1 -----MRAYDAIYAVVRTKLGIPFSRQTGLACNVCHTAFFM 37
TSA29379.1 -----MGSKKATG---IIRLLFLITVLLIFSNQTKAIPSFARQTGMSCNACHTIFPE 49
NJD23605.1 -----MDSKKN TI---VNSLLFLLTVLFFSNQTAIPSFARQTGMSCNTCHTIFPE 49
ODU99277.1 -----MAT---LGM-AGGAL--LLAPGSAQAVPSFARQTGMACEACHTVFPE 41
TLZ45134.1 -----MKSGAGNT---RAL-CGAALLSVLTAPAALAVPSFARQTGMACEACHTVYPE 48
AOY94926.1 -----MKARARYW---IAFGAAFALLIAALPQSGMAVPAFARQTGMACVACHVNFPE 49
*:*:* * * .** :*

```

```

cyc2 LTPMGRMFKLLGFTTTNLQRQOKLQAKFGNSVGLLISRVSQFSIFLQASATNVGGGQAVF 81
WP_114282823.1 LTPMGRIFKLMGYTTTNLQPPQKVEAKVGNVHLLLPRI SQFSIFVQASDTHVAGSQQAL 120
WP_070079636.1 LTPFGRQFKLLGYTMQNEPTVKADNGK----RLDIDRWAPLSLMVMVSDSLPQHPGPGN 103
OYV75648.1 LTAFGRSFKLNGYTLTG MKQIESTGTS-G---NVRINAI PPLSAMLQTFTHLNKAVPGQ 89
HAH22798.1 LTPFGRQFKLNAYTMTMMNTIESKQDS-DKVTRLKLLSYLPLSAMVQTSFSSNAKAVEGT 102
PYO94379.1 LTAFGRQFKLNAYTLTGLQTIGPTET--T-PSPLKINLI PPVSTMLQTSFTQTSKAQPGT 94
TSA29379.1 LNAFGRQFKLNGFTLVATEIIQAQADS-E-TTILSLPKSSPFSAMLQAS YTYKSKEQPAT 107
NJD23605.1 LNAFGRQFKLNGFTLVGMETIKAMSDS-E-TTILSLPKLSPFSAMLQAS YTYKSKEQPGT 107
ODU99277.1 LTPFGRRFKLNAYTIDNLPQVSGMNNAN--KDQTLALNQLPPLSFMFQTSYTKTKTAVPDS 99
TLZ45134.1 LTHFGRVFKANGYVLANLKVQVDVTAKE--KEQLLELQQT PPLSIMVQAS YTYKSKEQPGT 106
AOY94926.1 LTPFGRFFKLTGYTLSSNR-----TIPLSAMVQVSR TSSRTVDQA- 89
* . : ** * * .. : * .. : :

```

```

cyc2 G-----PGNSN-----AGASPNNNVQFPQQVSLFYAGEITPHIGSFLHLTYSGGGSGAGA 131
WP_114282823.1 G-----APART- AKGGQFPVGTNNNLEVPQQVSLFYAGEVTPHVGDFLHITYNGQ-----S 169
WP_070079636.1 -----DASQVEFPNQLSLFYAGAITDHIGTF LQYTA-GD-----G 137
OYV75648.1 -----QNDNVEFPQALS FYFAGEI SPHMG SFLQV TYTQP-----D 124
HAH22798.1 -----QNN SIAFPQQISM FYAGQITPHIGSFIQMTYD GQ----- 136
PYO94379.1 -----QNGNVEFPQELSVFFGEAISPR LGTFIQIT YDGA-----E 129
TSA29379.1 -----QNGNFSLPQQLSFFIAGALT PKVGGFIQAT YSDQ-----D 142
NJD23605.1 -----QNGNISFPQQLSFFVAGALT PKVGSFIQV TYSDQ-----D 142
ODU99277.1 QAGVIPPGGTAAPVSADALAKNGQVLF PQQASLFYAGRIAPNFGAFVQMTYHGT-----A 154
TLZ45134.1 SQ-----SAPGVAQNGTAGFPQQLSLFYAGKIAPHFGAFVQLTYAND-----S 149
AOY94926.1 N-----FDF-VRNDDLALQQASVFLAGRI FDHVGTFTQW TYDGI-----A 128
. : * : . : ..* * : *

```

```

cyc2 GGFSFDDSSIVWTHPWKLGITNNLLVTGVDVNTPTAMD LWNTPDWQAPFFSSDYSSWGH 191
WP_114282823.1 GTFAFDDSSIVRTQAWKLGHLNLTITGVDVNTPSATDLWNTPDWQAPFFTSNYTAEGA 229
WP_070079636.1 GAFGLDNTDVRYANQTS LG-STSVIYGIDLNNNPTVQDVWNSTPAWQFPYFTPGDTFTTA 196
OYV75648.1 DHFGFDMADFRYANRTTLG-ERGLVYGVTLN NAPGMEDVWNTPMWTYPYASDTA---- 179
HAH22798.1 -VFGMDNAEIRYANRTSLG-STSLLYGVTLN N NPTVQDVWNTPAWGFPTASSDAA---- 190
PYO94379.1 GTLGVDNIDLRYANHAKVL-SKRTIYGITV NNSPTVQDVWNSTPVWGFPPGSSGVA---- 184
TSA29379.1 GAFKLDNAEIRYADQTELA-SESFTYGVTLN N NPTVQDLWNTPAWRFPYAGSSVS---- 197
NJD23605.1 GSFGIDNAEIRYADQTELA-SESFTYGITL N N NPSVQDLWNTPAWRFPYAGSSVS---- 197
ODU99277.1 GTFGWDNTDIRYARAV---NDKFLWGLSFNN NPTVQDLWNTPAWQSPFDQRSATA--- 207
TLZ45134.1 GTISIDNTDLRFADMMVLPSEQSLVYGISL N N NPTVQDLWNTPAFGFPYASSNAV---- 205
AOY94926.1 HRAALDNTDIRAAWHL-AENDIDFIYGVTV N N NPTVSDVWNTPAFGFPYASSVS---- 183
* .. : * : .** * * : * : *

```

\* :

```

cyc2      VPPQ----FIESSAGAGYPLAGVGVYADIFGPNRANWLYADADVYTNQGQTVQVNPVVG-G      246
WP_114282823.1 VPTT----FIGSSPGAAPFLIGLGAYAADIVGPNRANWFYAEADAYNNSEGTGAAPNQGG      285
WP_070079636.1 GGAAVPATLIEGA-LA-QQVAGLTAYGY-----FDNTYYVEAGVYHGMNPN-----      240
OYV75648.1  -PTPAAGPLVN---MF-MNVAGLGGYAL-----WDNHWYGAATVYRSAPLG-----Q      221
HAH22798.1  -NSPAKSTLIE-N-LG-MQVAGLGAYAL-----IDNLLYGELTTYRSPSQG-----A      233
PYO94379.1  -PTPSGSPLINEG-LA-QSVAGIGTYAL-----WDDHLYGEVSVYRSPSQG-----G      228
TSA29379.1  -PTPSASPLIDGG-LA-QNVAGLVVFSM-----WNNLLYTEISVYKSAQQG-----S      241
NJD23605.1  -PEPSASPLIDGG-LA-QNVAGIGVFSM-----WNNLLYTEISVYKSAQQG-----S      241
ODU99277.1  -PGPSATTMIDGG-LAGAGVAGLSIYGS-----WNDSIYVELGAYRSAPA-----      250
TLZ45134.1  -VSPLAGTEIDGG-LA-QDVAGLSGYLF-----WNESLYAEVGGYRSKQGAANALTGA      256
AOY94926.1  -VTPAASTLIDGG-LA-QQVAGLAAYAF-----WQRSVYAEFGFYRTADGALS VFRTGQ      234
          :           : * :           *

```

```

cyc2      FTAAG---PQGRLSGGAPYVRLAYQHDWG-DWNWEVGTFGMWSSVYDNTINNTLNKAGGP      302
WP_114282823.1 FFEGGSNSLFGQLAGTAPYLRLAYQHDWS-DWNWEVGTYDMWSRVYASPI SNA-----      337
WP_070079636.1 ST-DSPANGGQYIKGMAPYWRLAYTQAG-NSNWEVGTGLLIAD-----VPVDGPTGP      291
OYV75648.1  GA-AP---SAGSVRNVAPYWRFAWQGYLPNRAYLEVGTYGLYADF-PRG--MMGMGTPGL      274
HAH22798.1  AN-PADSTSVMTVRGVAPYWRVALQHAWG-NNYAELGTFGIASN-----NFVNGISGP      284
PYO94379.1  PH-PPDATSTGIMKGVTPYWRLAYQRTFG-TQYIELGTFGMASQ-----LYPTGVTGP      279
TSA29379.1  HN-PPDSTSAGVLKSLAPYWRVALQKQFG-DCYLELGTFGLSAT-----MFPAGITGL      292
NJD23605.1  PN-PPDSTSSGILKSLAPYWRVALQKQFE-DFYLELGTFGLSAT-----MYPAGVTGL      292
ODU99277.1  AA-QIDSTSANVVSGMAPYWRLAYEQWG-RSSWEAGLYGIDAKLYPGG----GNALSGP      304
TLZ45134.1  AG-PLDGTASNVIEGVS PYWRVAYEYNHE-RHSIEAGLYGADFKLLPGA--STGTPLRGP      312
AOY94926.1  DI-NT-PGGVARLSGASPYWRLAYNHEWG-ANSLMLGTFGMIADRYPDN--T---LPGTP      286
          : . : ** * . *           *

```

```

cyc2      IDTFDDYDLDTQLQWLDTN-DNNMVTIRAAWVNEQQQFGAGNV-----ISSNSSGNL      353
WP_114282823.1 VNRFYDYDLDSQLQWLDIN-DNDNVTVRANLIHEDANFAAGAL-----NTSLTHGQL      388
WP_070079636.1 TDKFTDIGFDGQYQWLAGK---NIVTVHGAYYHEHQNLNGTALTGT-----SYGSQHL      342
OYV75648.1  TDKYIDLAVDTSYQQPLS--GTHLLSLHGVIHENRTLDSSFAKG-----LSSNRDTDM      326
HAH22798.1  IDKFTDVGFDLQYEHTLNT---GTLVLHSSLIRETEKRNSTIN-----NFHF      328
PYO94379.1  TDHFSVDVGADLQYERHAGKNGAGTFVHVHASYIDERQTLDASFSGG-----ASANAKNTL      333
TSA29379.1  TDQYSDVGFDLNFEKAFGA---DMLSARGSWIHE SRTL DASVANG-----SAFN TSGNL      343
NJD23605.1  TDQYSDVGFDLNFEKAFGT---DMLSARGSLIHE SRTL DASVANG-----EAF T TSGNL      343
ODU99277.1  TNHYRDWAIDSQYQYIGDE---HMISVLATYI SEKQTL DASYGVL----G-TAANPTNDL      356
TLZ45134.1  ENRFDVAEDIQYQFI ADE---HQVTVAGTRIHE NMSLDASFAAT----PAASANPKDDL      365
AOY94926.1  TDRFSDYALDAQYQYL TLP---HAFTAQAAMIYEKQNWRAFSPSGGIGAGPTPANPTDHL      343
          : : * * . :           . *

```

```

cyc2      NFFNINATYWYHDHYGIQGGYRNVWGSANPGLYGT---Y-----TNSGS      395
WP_114282823.1 NTFNINATYWYHDEYGAQGGFQDVTGTANSSFWGGN---V-----YTSANGS      432
WP_070079636.1 DTYNVSATYYYYRRMYGATLAYLGASSSSNAVDQ----SLAGPAGASTASGIPTTYAPGD      398
OYV75648.1  QQVRVDGNYEF SHHAQVSLGYFNTWGSTDAAFYATTPGAVDN-----SSSGN      373
HAH22798.1  NSFKIDGNLYLKNL GATMGYFNSSG TKDAD-----VVE-----SSTNK      367
PYO94379.1  NIVRADAAWLT PTRWGG SVGVFNTSGTADTLLYA--PGAVTG-----NATGK      378
TSA29379.1  NSFRVVGNYLHLSQIGFSLGYFSMTGDGDAILYA--PTSVSG-----SANGL      388
NJD23605.1  NSLRFVANYMHYSQIGFSLGYFSMTGDGDNILFA--PTSVSG-----SANGL      388
ODU99277.1  KTARIGVNYYYHRRYGGALGYFSTTGSADSGLYA--PAPFTG-----FANNK      401
TLZ45134.1  TTRRLWATYYYYRRKIGGTLGYFSTTGSADVLYP--PNAAGGPGVV-----TSANGS      415
AOY94926.1  TTFKARASYMYQRKYGGT LAYFSTTGNADPGLYA--PAPVTG-----SANGY      388

```



```

cyc2                P D T S N E W I E A S Y L P W W N T R F S L R Y V V Y N K F N G V G S A S ----- S N N L G Y G A S A Y N T L E L L A      450
WP_114282823.1     P N T T D E W V E A S Y L P W W N T R L S V R Y T V F N K F R G L T G ----- N N G V S P S K F N T I E L L A      483
WP_070079636.1     R G A S A Y I A Q L D Y V P W Y N T Q F S L Q Y M A F N K V N G T T I ----- D A A L N N Y F M L G M      445
OYV75648.1         P G S A G L I T E V D Y L P W D N T K F S L Q Y T A Y T K F N G A G S N Y N G A ----- G R S A S D N N T L Y L N S      427
HAH22798.1         P N S N G F I Y Q I E Y L P W Y N T K F S I Q Y I T Y S M F D G S S T N Y N G A ----- G R N A S D N N T L Y L L A      421
PYO94379.1         P N S N G V I A E L Q F M P W I N T R F S L Q Y V A Y Q K F N G G T S D Y D G A ----- G R S A S A N N T V Y A L V      432
TSA29379.1         P D S G G F T A E F D Y L P W L N T K L S V Q Y V A Y N K F N G G S N N Y D G E ----- G R N A S D N N T L Y L L C      442
NJD23605.1         P D S N G F T A E F D Y L P W L N T K L A I Q Y V A Y N K F N G G D N N Y D G Q ----- G R N A S D N N T L Y L L C      442
ODU99277.1         P D S K G W T A E L D W V P Y E N T K F A L Q Y T N Y S K F N G G S T N Y D G T A T P D H P G R N A S D N N T L Y L L G      461
TLZ45134.1         P D T R G W I A E V N Y L P W L N T K L T A Q Y V R Y N K F N G A S S N Y D G A ----- G R D A S D N N A W Y L L L      469
AOY94926.1         P D S R G L I F E L D Y L P H P Q V K L A L Q Y T W F L K F N G A H A N Y D G N ----- G R N A Q D N N T L Y L L A      442
.:                : . : * : : : : * : . *

```

  

```

cyc2                W I S Y      454
WP_114282823.1     W I A Y      487
WP_070079636.1     W Y A Y      449
OYV75648.1         W L M W      431
HAH22798.1         W F N F      425
PYO94379.1         W L M F      436
TSA29379.1         W V A F      446
NJD23605.1         W V A F      446
ODU99277.1         W I N F      465
TLZ45134.1         W F A Y      473
AOY94926.1         W F A F      446
* :

```

**Fig. S8: CLUSTAL O multiple sequence alignment.** Measured across top ten most closely related species cytochromes to Cyc2.

| <i>Rank</i> | <i>Binding Residues</i> | <i>Template</i> | <i>Score</i> | <i>Conserved</i> | <i>Ligand</i> |
|-------------|-------------------------|-----------------|--------------|------------------|---------------|
| 1           | 119H , 137D , 138D      | 1w69A1          | 1.175        | TRUE             | Fe(II/III)    |
| 2           | 367H , 368Y             | 2pt2A1          | 0.906        | False            |               |
| 3           | 308D , 335E , 336Q      | 4b2oA1          | 0.858        | TRUE             | Fe(II/III)    |
| 4           | 269H , 277E             | 4hr4A1          | 0.748        | False            |               |
| 5           | 12C , 15C               | 1h79A1          | 0.744        | TRUE             | Heme          |
| 6           | 43Q , 366D , 367H       | 3ovpA1          | 0.711        | False            |               |
| 7           | 365H , 368Y             | 1ey2A1          | 0.708        | False            |               |
| 8           | 229D , 231D             | 3ak9A1          | 0.703        | False            |               |
| 9           | 324N , 365H             | 2bq8X2          | 0.691        | False            |               |
| 10          | 267Y , 269H             | 2xgfA1          | 0.633        | False            |               |

**Fig. S9: Possible metal binding sites.** Top MIB ranked binding site predictions, conserved across related cytochrome c membrane proteins, and possible binding ligands. Cut offs for conservation were E-value < 3e-52 (top ten species identified by BLAST).

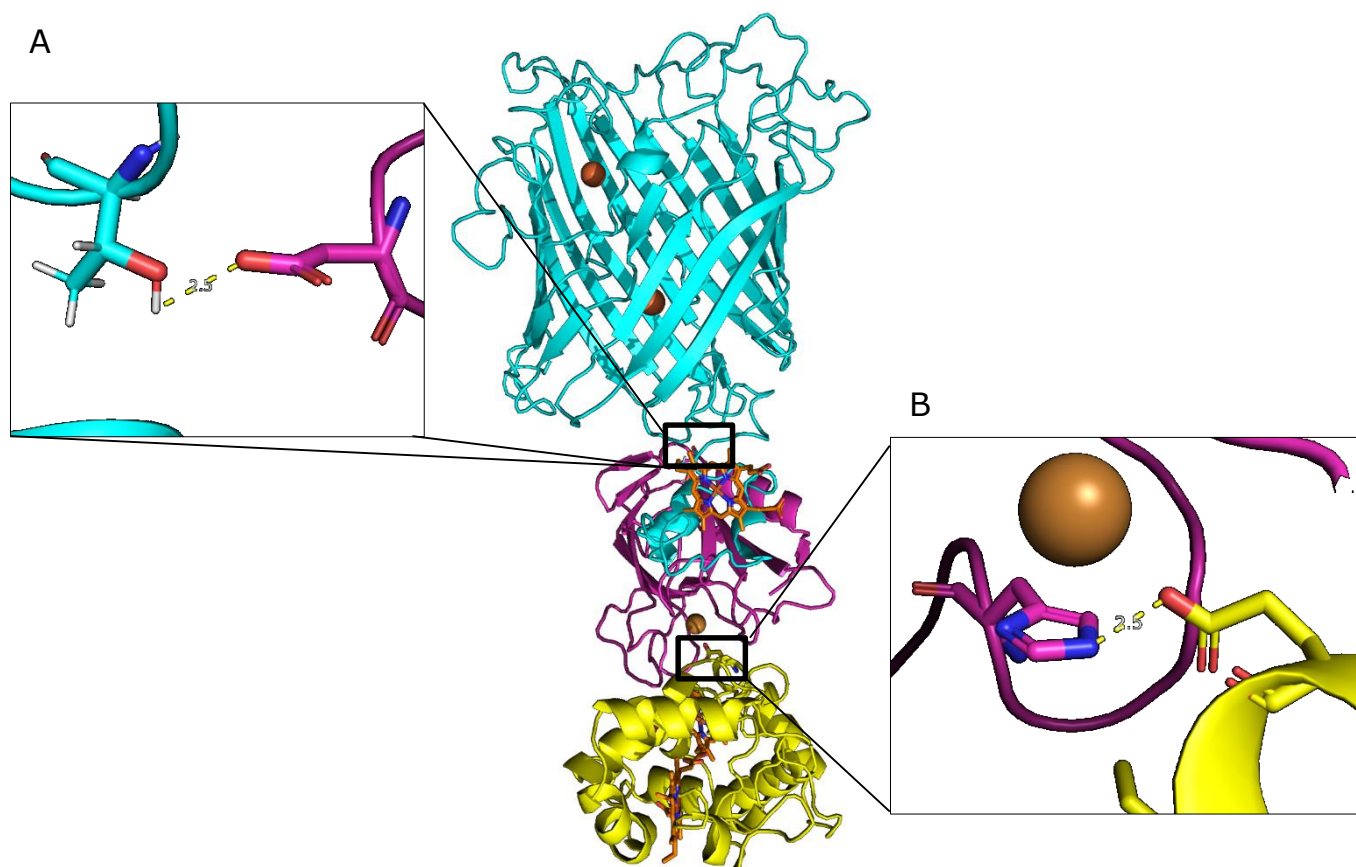

**Fig. S10. Identification of possible hydrogen bonding sites between docking partners in Cyc2 electron transfer chain.** A: The OD2 atom of D58 on Rcy was found to form a hydrogen bond with the proton on OG1 of T36 on Cyc2 (distance 2.5 Å). B: Hydrogen bond formation is plausible between the NE proton of rusticyanin H143 (carbon backbone in magenta) and the OE proton of Cyc1 E121 (carbon backbone in yellow), creating a docking interface for electron transfer from the bound copper ion in rusticyanin.

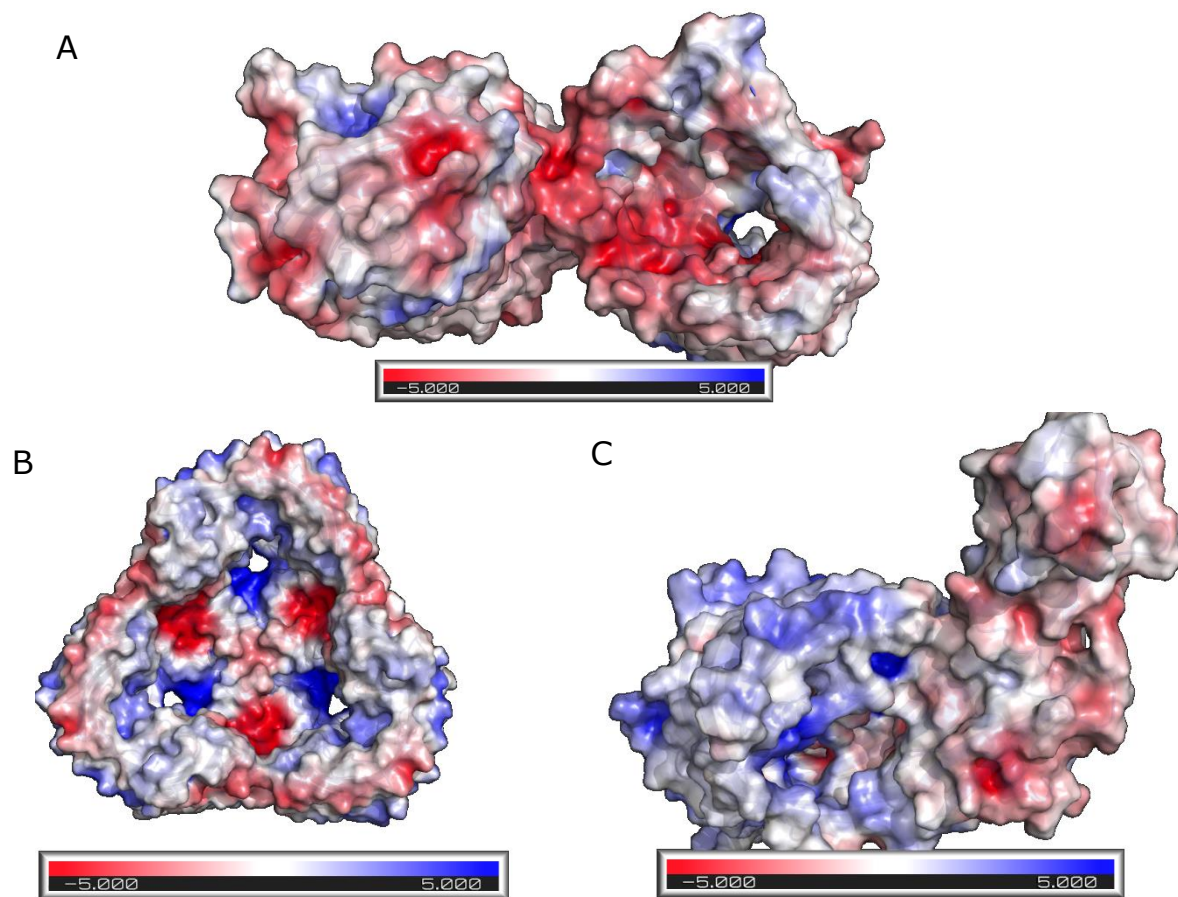

**Fig. S11: Poisson-Boltzmann potential calculated for anion-specific, cation-specific, and nonspecific TMBB porins.** Poisson-Boltzmann potential diagrams created using PDB2PQR, where blue indicates regions of positive potential ( $> +5$  kT/e) and red depicts negative potential ( $< -5$  kT/e). (24). A: Cation selective pathway of OmpF porin (PDB ID: 3HWB). Pore facing residues have high negative potential, shown in red (21). B: Anion selective pathway of Omp32 porin (PDB ID: 2FGQ). Pore facing residues have high positive potential, shown in blue (98). C: Filamentous hemagglutinin transporter protein (PDB ID: 3NJT). There is no strong Poisson-Boltzmann potential gradient within the protein (20).

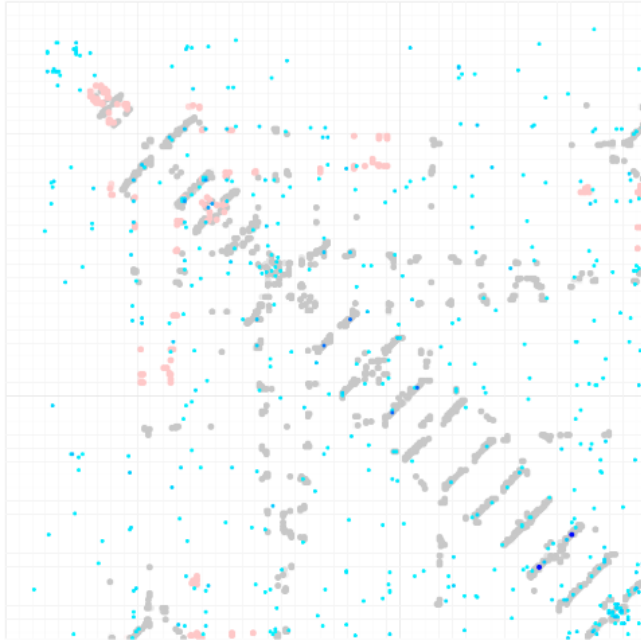

**Fig. S12: Predicted residue-residue contacts between Cyc2 sequence and 2o4v.** Computed by GREMLIN to likely homolog 2o4v, as calculated by evolutionary similarity.

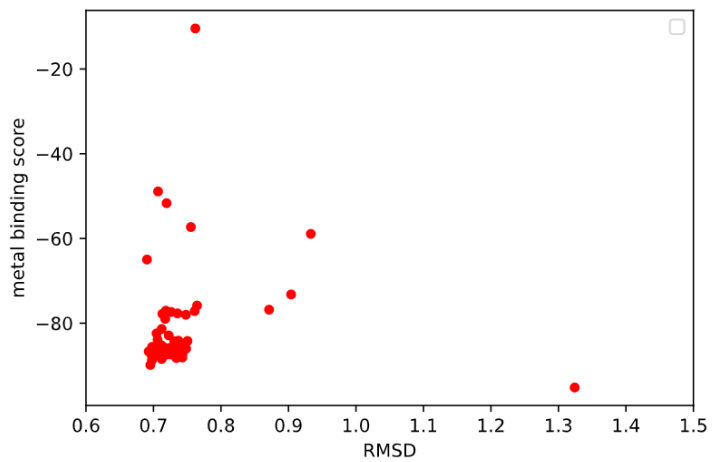

**Fig. S13. Metal-binding score vs RMSD.** This plot shows 100 trajectories of FastRelax on residues homologous to metal chelating residues.

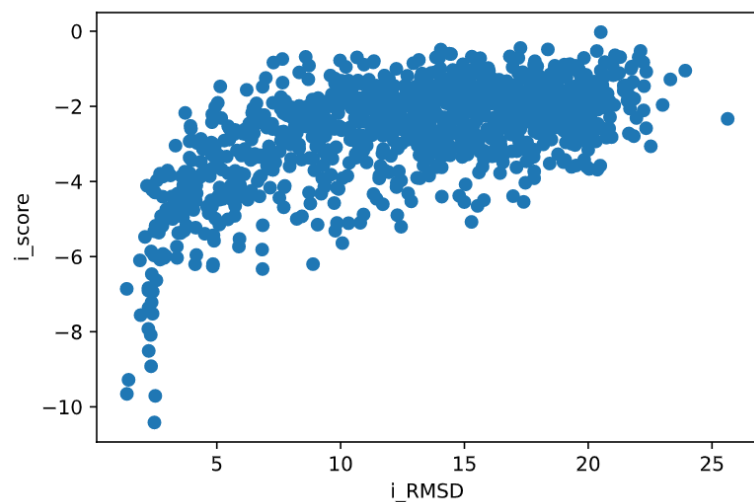

**Fig. S14: Funnel plot of interface score vs. interface RMSD for docking Cyc2 model against known Rcy-Cyc1 complex.** Calculated for docking Cyc2 model against Rcy-Cyc1 complex, which has been previously documented (1)
